# Supplementary material for: Overview and Analysis of the Cost of Drug Programs in Poland: Public Payer Expenditures and Coverage of Cancer and Non-Neoplastic Diseases Related Drug Therapies from 2015–2018 Years
Source: PubMed Central journal article supplement (PMC7456857; doi:10.3389/fphar.2020.01123), 2020-08-14
Supplement: DataSheet_1.pdf [file DataSheet_1.pdf]

## SUPPLEMENTARY DATA

### REIMBURSEMENT BY DRUG PROGRAMME TYPE IN POLAND ESTIMATES TO 2015

*Appendix. 1. Reimbursement by drug programme type in Poland estimates to 2015, [USD].*

| Lp. | Number of drug program | Name of drug program                                                                                             | Type            | Values of reimbursement realised by the NHF, [USD] |
|-----|------------------------|------------------------------------------------------------------------------------------------------------------|-----------------|----------------------------------------------------|
| 1   | B.9.                   | Treatment of breast cancer                                                                                       | oncological     | 78 485 573                                         |
| 2   | B.29.                  | Treatment of multiple sclerosis                                                                                  | non-oncological | 54 647 054                                         |
| 3   | B.2.                   | Treatment of chronic viral hepatitis C                                                                           | non-oncological | 38 244 466                                         |
| 4   | B.10.                  | Treatment of renal cell carcinoma                                                                                | oncological     | 33 328 329                                         |
| 5   | B.14.                  | Chronic myeloid leukemia                                                                                         | oncological     | 31 779 778                                         |
| 6   | B.54.                  | Lenalidomide in the treatment of refractory or relapsed multiple myeloma                                         | oncological     | 28 788 394                                         |
| 7   | B.71.                  | Interferon-free treatment of chronic viral hepatitis C                                                           | non-oncological | 28 727 888                                         |
| 8   | B.4.                   | Treatment of advanced colorectal cancer                                                                          | oncological     | 27 788 808                                         |
| 9   | B.33.                  | Treatment of rheumatoid arthritis and aggressive juvenile idiopathic arthritis                                   | non-oncological | 27 346 493                                         |
| 10  | B.3.                   | Treatment of gastrointestinal stromal tumours (GIST)                                                             | oncological     | 21 902 549                                         |
| 11  | B.1.                   | Treatment of chronic viral hepatitis B                                                                           | non-oncological | 21 200 573                                         |
| 12  | B.36.                  | Treatment of beneficiaries with severe active ankylosing spondylitis with TNF alfa inhibitors                    | non-oncological | 18 834 410                                         |
| 13  | B.31.                  | Treatment of pulmonary arterial hypertension (PAH)                                                               | non-oncological | 18 695 466                                         |
| 14  | B.59.                  | Treatment of melanoma of skin or mucosal melanoma                                                                | oncological     | 17 534 442                                         |
| 15  | B.12.                  | Treatment of malignant lymphomas                                                                                 | oncological     | 16 893 316                                         |
| 16  | B.48.                  | Treatment of skin melanoma                                                                                       | oncological     | 15 093 385                                         |
| 17  | B.46.                  | Treatment of multiple sclerosis after first line treatment failure or rapidly evolving severe multiple sclerosis | non-oncological | 12 716 300                                         |
| 18  | B.23.                  | Treatment of Gaucher's disease                                                                                   | non-oncological | 11 937 381                                         |

| Lp. | Number of drug program | Name of drug program                                                                | Type            | Values of reimbursement realised by the NHF, [USD] |
|-----|------------------------|-------------------------------------------------------------------------------------|-----------------|----------------------------------------------------|
| 19  | B.6.                   | Treatment of non-small cell lung cancer                                             | oncological     | 10 367 449                                         |
| 20  | B.35.                  | Treatment of aggressive psoriatic arthritis                                         | non-oncological | 9 335 776                                          |
| 21  | B.25.                  | Treatment of mucopolisaccharosis type II (Hunter syndrome)                          | non-oncological | 9 109 280                                          |
| 22  | B.15.                  | Haemorrhages prevention in children with haemophilia A and B                        | non-oncological | 8 863 718                                          |
| 23  | B.22.                  | Treatment of Pompe disease                                                          | non-oncological | 7 973 901                                          |
| 24  | B.32.                  | Treatment of Crohn's disease (CD)                                                   | non-oncological | 7 751 211                                          |
| 25  | B.56.                  | Treatment of castration-resistant prostate cancer                                   | oncological     | 7 642 649                                          |
| 26  | B.39.                  | Treatment of secondary hyperparathyroidism in haemodialysis patients                | non-oncological | 7 641 937                                          |
| 27  | B.40.                  | Prevention of respiratory syncytial virus infections                                | non-oncological | 5 777 221                                          |
| 28  | B.19.                  | Treatment of dwarf children with somatotropin pituitary insufficiency               | non-oncological | 5 688 023                                          |
| 29  | B.44.                  | Treatment of severe ige-dependent allergic asthma with omalizumab                   | non-oncological | 5 313 629                                          |
| 30  | B.50.                  | Treatment of patients with advanced ovarian cancer                                  | oncological     | 5 179 768                                          |
| 31  | B.8.                   | Treatment of soft tissue sarcomas                                                   | oncological     | 3 674 907                                          |
| 32  | B.47.                  | Treatment of moderate and severe plaque psoriasis                                   | non-oncological | 3 646 576                                          |
| 33  | B.67.                  | Treatment with immunoglobulin transfusions in neurologic diseases                   | non-oncological | 3 473 645                                          |
| 34  | B.24.                  | Treatment of Hurler disease                                                         | non-oncological | 2 898 332                                          |
| 35  | B.5.                   | Treatment of hepatocellular carcinoma                                               | oncological     | 2 525 210                                          |
| 36  | B.62.                  | Treatment of primary immune deficiency (PID) in adult patients                      | non-oncological | 2 361 726                                          |
| 37  | B.28.                  | Treatment of focal dystonia and hemifacial spasm                                    | non-oncological | 2 140 716                                          |
| 38  | B.17.                  | Treatment of primary immunodeficiency in children                                   | non-oncological | 2 023 049                                          |
| 39  | B.26.                  | Treatment of mucopolysaccharidosis type IV (Maroteaux-Lamy syndrome)                | non-oncological | 1 756 214                                          |
| 40  | B.58.                  | Treatment of advanced gastric cancer                                                | oncological     | 1 483 182                                          |
| 41  | B.70.                  | Treatment of neovascular (exudative) form of age-related macular degeneration (AMD) | non-oncological | 1 220 918                                          |
| 42  | B.53.                  | Treatment of well-differentiated neuroendocrine pancreatic carcinoma                | oncological     | 1 163 269                                          |
| 43  | B.20.                  | Treatment of dwarf children with severe primary igf-1 deficiency                    | non-oncological | 1 065 371                                          |

| Lp. | Number of drug program | Name of drug program                                                                                                              | Type            | Values of reimbursement realised by the NHF, [USD] |
|-----|------------------------|-----------------------------------------------------------------------------------------------------------------------------------|-----------------|----------------------------------------------------|
| 44  | B.42.                  | Treatment of dwarf children with Turner syndrome (TS)                                                                             | non-oncological | 1 043 551                                          |
| 45  | B.68.                  | Treatment of pulmonary arterial hypertension with sildenafil, epoprostenol and macitentan (PAH)                                   | non-oncological | 1 009 212                                          |
| 46  | B.60.                  | Treatment of Gaucher's disease type 1                                                                                             | non-oncological | 996 794                                            |
| 47  | B.37.                  | Treatment of anaemia in the course of chronic renal insufficiency                                                                 | non-oncological | 917 417                                            |
| 48  | B.55.                  | Treatment of patients with ulcerative colitis                                                                                     | non-oncological | 897 512                                            |
| 49  | B.57.                  | Treatment of upper limb spasticity after stroke with botulinum toxin type A                                                       | non-oncological | 877 637                                            |
| 50  | B.65.                  | Treatment of Philadelphia chromosome-positive (Ph+) chronic acute lymphoblastic leukemia with dasatinib                           | oncological     | 794 456                                            |
| 51  | B.30.                  | Treatment of spasticity in cerebral palsy                                                                                         | non-oncological | 780 659                                            |
| 52  | B.27.                  | Treatment of chronic lung infections in beneficiaries with mucoviscidosis                                                         | non-oncological | 650 177                                            |
| 53  | B.69.                  | Treatment with paricalcitol of secondary hyperparathyroidism in haemodialysis patients                                            | non-oncological | 512 270                                            |
| 54  | B.49.                  | Oral treatment of iron overload states in the body                                                                                | non-oncological | 511 029                                            |
| 55  | B.66.                  | Treatment with bexarotene of mycosis fungoides or Sézary syndrome                                                                 | non-oncological | 427 935                                            |
| 56  | B.18.                  | Treatment of premature sexual maturation in children                                                                              | non-oncological | 367 710                                            |
| 57  | B.52.                  | Treatment of squamous cell cancer of head and neck in combination with radition therapy in locally advanced disease               | oncological     | 365 720                                            |
| 58  | B.72.                  | Treatment of melanoma with combination therapy with dabrafenib and trametinib                                                     | oncological     | 315 583                                            |
| 59  | B.63.                  | Treatment of non-small cell lung cancer with afatinib                                                                             | oncological     | 260 392                                            |
| 60  | B.43.                  | Treatment of viral hepatitis B in beneficiaries after transplantations or in beneficiaries with lymphomas, treated with rituximab | non-oncological | 208 648                                            |
| 61  | B.41.                  | Treatment of Prader-Willi syndrome                                                                                                | non-oncological | 177 211                                            |
| 62  | B.38.                  | Treatment of dwarf children with chronic kidney failure                                                                           | non-oncological | 109 261                                            |
| 63  | B.64.                  | Treatment with growth hormone of dwarf children born too small in relation to pregnancy length (sga or iugr)                      | non-oncological | 57 541                                             |
| 64  | B.21.                  | Treatment of severe familial hyperhomocysteinemia                                                                                 | non-oncological | 50 563                                             |
| 65  | B.75.                  | Treatment of active granulomatosis with polyangiitis (gpa) or microscopic polyangiitis (mpa)                                      | non-oncological | 34 340                                             |
| 66  | B.74.                  | Treatment of chronic thromboembolic pulmonary hypertension (cteph)                                                                | non-oncological | 27 247                                             |
| 67  | B.73.                  | Treatment of neurogenic detrusor overactivity                                                                                     | non-oncological | 10 860                                             |

| Lp. | Number of drug program | Name of drug program                          | Type            | Values of reimbursement realised by the NHF, [USD] |
|-----|------------------------|-----------------------------------------------|-----------------|----------------------------------------------------|
| 68  | B.61.                  | Treatment of nephropathic juvenile cystinosis | non-oncological | 8 197                                              |
| 69  | B.76.                  | Treatment of tyrosinemia type 1 (ht-1)        | non-oncological | 0                                                  |

Source: own elaboration, NHF data.

## REIMBURSEMENT BY DRUG PROGRAMME TYPE IN POLAND ESTIMATES TO 2016

Appendix. 2. Reimbursement by drug programme type in Poland estimates to 2016, [USD].

| Lp. | Number of drug program | Name of drug program                                                                                             | Type            | Values of reimbursement realised by the NHF, [USD] |
|-----|------------------------|------------------------------------------------------------------------------------------------------------------|-----------------|----------------------------------------------------|
| 1   | B.71.                  | Interferon-free treatment of chronic viral hepatitis C                                                           | non-oncological | 116 043 837                                        |
| 2   | B.9.                   | Treatment of breast cancer                                                                                       | oncological     | 82 626 134                                         |
| 3   | B.29.                  | Treatment of multiple sclerosis                                                                                  | non-oncological | 58 685 457                                         |
| 4   | B.10.                  | Treatment of renal cell carcinoma                                                                                | oncological     | 34 788 764                                         |
| 5   | B.33.                  | Treatment of rheumatoid arthritis and aggressive juvenile idiopathic arthritis                                   | non-oncological | 32 656 860                                         |
| 6   | B.54.                  | Lenalidomide in the treatment of refractory or relapsed multiple myeloma                                         | oncological     | 31 718 703                                         |
| 7   | B.4.                   | Treatment of advanced colorectal cancer                                                                          | oncological     | 31 532 468                                         |
| 8   | B.14.                  | Chronic myeloid leukemia                                                                                         | oncological     | 31 292 976                                         |
| 9   | B.3.                   | Treatment of gastrointestinal stromal tumours (GIST)                                                             | oncological     | 23 254 701                                         |
| 10  | B.36.                  | Treatment of beneficiaries with severe active ankylosing spondylitis with TNF alfa inhibitors                    | non-oncological | 19 035 602                                         |
| 11  | B.1.                   | Treatment of chronic viral hepatitis B                                                                           | non-oncological | 18 998 771                                         |
| 12  | B.31.                  | Treatment of pulmonary arterial hypertension (PAH)                                                               | non-oncological | 17 609 026                                         |
| 13  | B.12.                  | Treatment of malignant lymphomas                                                                                 | oncological     | 17 211 421                                         |
| 14  | B.70.                  | Treatment of neovascular (exudative) form of age-related macular degeneration (AMD)                              | non-oncological | 16 524 091                                         |
| 15  | B.46.                  | Treatment of multiple sclerosis after first line treatment failure or rapidly evolving severe multiple sclerosis | non-oncological | 16 387 806                                         |

| Lp. | Number of drug program | Name of drug program                                                                            | Type            | Values of reimbursement realised by the NHF, [USD] |
|-----|------------------------|-------------------------------------------------------------------------------------------------|-----------------|----------------------------------------------------|
| 16  | B.23.                  | Treatment of Gaucher's disease                                                                  | non-oncological | 12 247 283                                         |
| 17  | B.48.                  | Treatment of skin melanoma                                                                      | oncological     | 12 086 553                                         |
| 18  | B.59.                  | Treatment of melanoma of skin or mucosal melanoma                                               | oncological     | 11 564 784                                         |
| 19  | B.67.                  | Treatment with immunoglobulin transfusions in neurologic diseases                               | non-oncological | 10 933 407                                         |
| 20  | B.15.                  | Haemorrhages prevention in children with haemophilia A and B                                    | non-oncological | 10 751 162                                         |
| 21  | B.56.                  | Treatment of castration-resistant prostate cancer                                               | oncological     | 9 582 437                                          |
| 22  | B.35.                  | Treatment of aggressive psoriatic arthritis                                                     | non-oncological | 9 240 550                                          |
| 23  | B.6.                   | Treatment of non-small cell lung cancer                                                         | oncological     | 8 596 134                                          |
| 24  | B.22.                  | Treatment of Pompe disease                                                                      | non-oncological | 8 261 478                                          |
| 25  | B.25.                  | Treatment of mucopolisaccharosis type II (Hunter syndrome)                                      | non-oncological | 8 119 287                                          |
| 26  | B.68.                  | Treatment of pulmonary arterial hypertension with sildenafil, epoprostenol and macitentan (PAH) | non-oncological | 7 314 161                                          |
| 27  | B.72.                  | Treatment of skin cancer with dabrafenib                                                        | oncological     | 7 254 412                                          |
| 28  | B.32.                  | Treatment of Crohn's disease (CD)                                                               | non-oncological | 7 151 874                                          |
| 29  | B.50.                  | Treatment of patients with advanced ovarian cancer                                              | oncological     | 6 341 163                                          |
| 30  | B.19.                  | Treatment of dwarf children with somatotropin pituitary insufficiency                           | non-oncological | 5 974 292                                          |
| 31  | B.44.                  | Treatment of severe ige-dependent allergic asthma with omalizumab                               | non-oncological | 5 785 056                                          |
| 32  | B.39.                  | Treatment of secondary hyperparathyroidism in haemodialysis patients                            | non-oncological | 5 719 989                                          |
| 33  | B.40.                  | Prevention of respiratory syncytial virus infections                                            | non-oncological | 5 717 411                                          |
| 34  | B.62.                  | Treatment of primary immune deficiency (PID) in adult patients                                  | non-oncological | 5 268 223                                          |
| 35  | B.2.                   | Treatment of chronic viral hepatitis C                                                          | non-oncological | 5 110 817                                          |
| 36  | B.8.                   | Treatment of soft tissue sarcomas                                                               | oncological     | 4 140 049                                          |
| 37  | B.47.                  | Treatment of moderate and severe plaque psoriasis                                               | non-oncological | 4 128 566                                          |
| 38  | B.5.                   | Treatment of hepatocellular carcinoma                                                           | oncological     | 3 257 092                                          |
| 39  | B.24.                  | Treatment of Hurler disease                                                                     | non-oncological | 3 044 951                                          |
| 40  | B.77.                  | Treatment of resistant and relapse lymphomas cd30+                                              | non-oncological | 2 789 296                                          |
| 41  | B.69.                  | Treatment with paricalcitol of secondary hyperparathyroidism in haemodialysis patients          | non-oncological | 2 301 767                                          |

| Lp. | Number of drug program | Name of drug program                                                                                                              | Type            | Values of reimbursement realised by the NHF, [USD] |
|-----|------------------------|-----------------------------------------------------------------------------------------------------------------------------------|-----------------|----------------------------------------------------|
| 42  | B.28.                  | Treatment of focal dystonia and hemifacial spasm                                                                                  | non-oncological | 2 273 806                                          |
| 43  | B.17.                  | Treatment of primary immunodeficiency in children                                                                                 | non-oncological | 2 072 179                                          |
| 44  | B.74.                  | Treatment of chronic thromboembolic pulmonary hypertension (cteph)                                                                | non-oncological | 1 913 521                                          |
| 45  | B.58.                  | Treatment of advanced gastric cancer                                                                                              | oncological     | 1 726 773                                          |
| 46  | B.63.                  | Treatment of non-small cell lung cancer with afatinib                                                                             | oncological     | 1 345 313                                          |
| 47  | B.53.                  | Treatment of well-differentiated neuroendocrine pancreatic carcinoma                                                              | oncological     | 1 273 548                                          |
| 48  | B.65.                  | Treatment of Philadelphia chromosome-positive (Ph+) chronic acute lymphoblastic leukemia with dasatinib                           | oncological     | 1 108 758                                          |
| 49  | B.60.                  | Treatment of Gaucher's disease type 1                                                                                             | non-oncological | 1 080 163                                          |
| 50  | B.42.                  | Treatment of dwarf children with Turner syndrome (TS)                                                                             | non-oncological | 1 073 089                                          |
| 51  | B.20.                  | Treatment of dwarf children with severe primary igf-1 deficiency                                                                  | non-oncological | 1 064 833                                          |
| 52  | B.57.                  | Treatment of upper limb spasticity after stroke with botulinum toxin type A                                                       | non-oncological | 963 595                                            |
| 53  | B.76.                  | Treatment of tyrosinemia type 1 (ht-1)                                                                                            | non-oncological | 938 053                                            |
| 54  | B.26.                  | Treatment of mucopolysaccharidosis type IV (Maroteaux-Lamy syndrome)                                                              | non-oncological | 925 455                                            |
| 55  | B.30.                  | Treatment of spasticity in cerebral palsy                                                                                         | non-oncological | 852 478                                            |
| 56  | B.37.                  | Treatment of anaemia in the course of chronic renal insufficiency                                                                 | non-oncological | 802 289                                            |
| 57  | B.66.                  | Treatment with bexarotene of mycosis fungoides or Sézary syndrome                                                                 | non-oncological | 764 950                                            |
| 58  | B.27.                  | Treatment of chronic lung infections in beneficiaries with mucoviscidosis                                                         | non-oncological | 743 424                                            |
| 59  | B.55.                  | Remission induction in ulcerative colitis                                                                                         | non-oncological | 704 633                                            |
| 60  | B.49.                  | Oral treatment of iron overload states in the body                                                                                | non-oncological | 615 274                                            |
| 61  | B.52.                  | Treatment of squamous cell cancer of head and neck in combination with radiation therapy in locally advanced disease              | oncological     | 520 243                                            |
| 62  | B.18.                  | Treatment of premature sexual maturation in children                                                                              | non-oncological | 430 970                                            |
| 63  | B.75.                  | Treatment of active granulomatosis with polyangiitis (gpa) or microscopic polyangiitis (mpa)                                      | non-oncological | 429 808                                            |
| 64  | B.43.                  | Treatment of viral hepatitis B in beneficiaries after transplantations or in beneficiaries with lymphomas, treated with rituximab | non-oncological | 218 676                                            |
| 65  | B.41.                  | Treatment of children with Prader-Willi syndrome                                                                                  | non-oncological | 188 621                                            |
| 66  | B.64.                  | Treatment with growth hormone of dwarf children born too small in relation to pregnancy length (sga lub)                          | non-oncological | 174 771                                            |

| Lp. | Number of drug program | Name of drug program                                                                                                                                       | Type            | Values of reimbursement realised by the NHF, [USD] |
|-----|------------------------|------------------------------------------------------------------------------------------------------------------------------------------------------------|-----------------|----------------------------------------------------|
|     |                        | iugr)                                                                                                                                                      |                 |                                                    |
| 67  | B.79.                  | Treatment of chronic lymphocytic leukemia with obinutuzumab                                                                                                | non-oncological | 127 420                                            |
| 68  | B.38.                  | Treatment of dwarf children with chronic kidney failure                                                                                                    | non-oncological | 90 410                                             |
| 69  | B.21.                  | Treatment of severe familial hyperhomocysteinemia                                                                                                          | non-oncological | 55 864                                             |
| 70  | B.73.                  | Treatment of neurogenic detrusor overactivity                                                                                                              | non-oncological | 45 940                                             |
| 71  | B.80.                  | Maintenance therapy with olaparib of patients with relapsed platinum-sensitive advanced ovarian cancer, fallopian tube cancer or primary peritoneal cancer | oncological     | 41 756                                             |
| 72  | B.61.                  | Treatment of nephropathic juvenile cystinosis                                                                                                              | non-oncological | 21 130                                             |
| 73  | B.78.                  | Treatment of primary immune deficiencies in adult patients with normal human immunoglobulin administered with human recombinant hyaluronidase              | non-oncological | 20 118                                             |

Source: own elaboration, NHF data.

## REIMBURSEMENT BY DRUG PROGRAMME TYPE IN POLAND ESTIMATES TO 2017

Appendix. 3. Reimbursement by drug programme type in Poland estimates to 2017, [USD].

| Lp. | Number of drug program | Name of drug program                                   | Type            | Values of reimbursement realised by the NHF, [USD] |
|-----|------------------------|--------------------------------------------------------|-----------------|----------------------------------------------------|
| 1   | B.9.                   | Treatment of breast cancer                             | oncological     | 118 276 084                                        |
| 2   | B.71.                  | Interferon-free treatment of chronic viral hepatitis C | non-oncological | 109 178 658                                        |
| 3   | B.29.                  | Treatment of multiple sclerosis                        | non-oncological | 66 378 300                                         |
| 4   | B.54.                  | Treatment of refractory or relapsed multiple myeloma   | oncological     | 36 985 168                                         |
| 5   | B.10.                  | Treatment of renal cell carcinoma                      | oncological     | 35 019 759                                         |
| 6   | B.4.                   | Treatment of advanced colorectal cancer                | oncological     | 34 302 745                                         |

| Lp. | Number of drug program | Name of drug program                                                                                             | Type            | Values of reimbursement realised by the NHF, [USD] |
|-----|------------------------|------------------------------------------------------------------------------------------------------------------|-----------------|----------------------------------------------------|
| 7   | B.33.                  | Treatment of rheumatoid arthritis and aggressive juvenile idiopathic arthritis                                   | non-oncological | 33 284 884                                         |
| 8   | B.14.                  | Treatment of chronic myeloid leukemia                                                                            | oncological     | 28 998 737                                         |
| 9   | B.59.                  | Treatment of skin or mucosal melanoma                                                                            | oncological     | 23 710 717                                         |
| 10  | B.3.                   | Treatment of gastrointestinal stromal tumours (GIST)                                                             | oncological     | 21 657 287                                         |
| 11  | B.36.                  | Treatment of beneficiaries with severe active ankylosing spondylitis with TNF alfa inhibitors                    | non-oncological | 19 046 874                                         |
| 12  | B.46.                  | Treatment of multiple sclerosis after first line treatment failure or rapidly evolving severe multiple sclerosis | non-oncological | 18 823 968                                         |
| 13  | B.31.                  | Treatment of pulmonary arterial hypertension (PAH)                                                               | non-oncological | 18 700 871                                         |
| 14  | B.70.                  | Treatment of neovascular (exudative) form of age-related macular degeneration (AMD)                              | non-oncological | 18 103 475                                         |
| 15  | B.12.                  | Treatment of malignant lymphomas                                                                                 | oncological     | 16 949 679                                         |
| 16  | B.1.                   | Treatment of chronic viral hepatitis B                                                                           | non-oncological | 16 726 079                                         |
| 17  | B.67.                  | Treatment with immunoglobulin transfusions in neurologic diseases                                                | non-oncological | 14 663 919                                         |
| 18  | B.72.                  | Treatment of melanoma with combination therapy with dabrafenib and trametinib                                    | oncological     | 14 174 447                                         |
| 19  | B.56.                  | Treatment of castration-resistant prostate cancer                                                                | oncological     | 13 387 547                                         |
| 20  | B.23.                  | Treatment of Gaucher's disease type 1                                                                            | non-oncological | 13 357 659                                         |
| 21  | B.15.                  | Haemorrhages prevention in children with haemophilia A and B                                                     | non-oncological | 11 488 207                                         |
| 22  | B.68.                  | Treatment of pulmonary arterial hypertension with sildenafil, epoprostenol and macitentan (PAH)                  | non-oncological | 10 770 605                                         |
| 23  | B.35.                  | Treatment of aggressive psoriatic arthritis                                                                      | non-oncological | 10 314 324                                         |
| 24  | B.22.                  | Treatment of Pompe disease                                                                                       | non-oncological | 9 579 385                                          |
| 25  | B.77.                  | Treatment of resistant and relapse lymphomas cd30+                                                               | oncological     | 9 355 582                                          |



| Lp. | Number of drug program | Name of drug program                                                                                            | Type            | Values of reimbursement realised by the NHF, [USD] |
|-----|------------------------|-----------------------------------------------------------------------------------------------------------------|-----------------|----------------------------------------------------|
| 26  | B.32.                  | Treatment of Crohn's disease (CD)                                                                               | non-oncological | 8 454 469                                          |
| 27  | B.48.                  | Treatment of skin melanoma                                                                                      | oncological     | 8 210 473                                          |
| 28  | B.6.                   | Treatment of non-small cell lung cancer                                                                         | oncological     | 7 614 113                                          |
| 29  | B.50.                  | Treatment of patients with advanced ovarian cancer                                                              | oncological     | 7 409 942                                          |
| 30  | B.44.                  | Treatment of severe ige-dependent allergic asthma with omalizumab                                               | non-oncological | 6 782 211                                          |
| 31  | B.40.                  | Prevention of respiratory syncytial virus infections                                                            | non-oncological | 6 562 042                                          |
| 32  | B.25.                  | Treatment of mucopolisacharosis type II (Hunter syndrome)                                                       | non-oncological | 6 506 251                                          |
| 33  | B.19.                  | Treatment of dwarf children with somatotropin pituitary insufficiency                                           | non-oncological | 6 401 367                                          |
| 34  | B.62.                  | Treatment of primary immunodeficiency in adults                                                                 | non-oncological | 5 757 874                                          |
| 35  | B.47.                  | Treatment of moderate and severe plaque psoriasis                                                               | non-oncological | 5 223 983                                          |
| 36  | B.8.                   | Treatment of soft tissue sarcomas                                                                               | oncological     | 4 288 962                                          |
| 37  | B.39.                  | Treatment of secondary hyperparathyroidism in haemodialysis patients                                            | non-oncological | 3 950 574                                          |
| 38  | B.74.                  | Treatment of chronic thromboembolic pulmonary hypertension (cteph)                                              | non-oncological | 3 298 036                                          |
| 39  | B.5.                   | Treatment of hepatocellular carcinoma                                                                           | oncological     | 3 283 906                                          |
| 40  | B.79.                  | Treatment of chronic lymphocytic leukemia with obinutuzumab                                                     | oncological     | 3 071 287                                          |
| 41  | B.24.                  | Treatment of Hurler disease                                                                                     | non-oncological | 2 935 966                                          |
| 42  | B.63.                  | Treatment of non-small cell lung cancer with afatinib and nintedanib                                            | oncological     | 2 468 621                                          |
| 43  | B.28.                  | Treatment of focal dystonia and hemifacial spasm                                                                | non-oncological | 2 392 192                                          |
| 44  | B.81.                  | Treatment of primary mielofibrosis and secondary mielofibrosis in the course of polycyhemias and thrombocytosis | oncological     | 2 382 702                                          |

| Lp. | Number of drug program | Name of drug program                                                                                                                                                                                                     | Type            | Values of reimbursement realised by the NHF, [USD] |
|-----|------------------------|--------------------------------------------------------------------------------------------------------------------------------------------------------------------------------------------------------------------------|-----------------|----------------------------------------------------|
| 45  | B.80.                  | Maintenance therapy with olaparib of patients with relapsed platinum-sensitive advanced ovarian cancer, fallopian tube cancer or primary peritoneal cancer                                                               | oncological     | 2 329 554                                          |
| 46  | B.17.                  | Treatment of primary immunodeficiency in children                                                                                                                                                                        | non-oncological | 2 290 480                                          |
| 47  | B.2.                   | Treatment of chronic viral hepatitis c                                                                                                                                                                                   | non-oncological | 2 198 818                                          |
| 48  | B.58.                  | Treatment of advanced gastric cancer                                                                                                                                                                                     | oncological     | 2 097 652                                          |
| 49  | B.55.                  | Treatment of patients with colitis ulcerosis                                                                                                                                                                             | non-oncological | 1 837 395                                          |
| 50  | B.53.                  | Treatment of well-differentiated neuroendocrine pancreatic carcinoma                                                                                                                                                     | oncological     | 1 766 397                                          |
| 51  | B.26.                  | Treatment of mucopolysaccharidosis type iv (maroteaux-lamy syndrome)                                                                                                                                                     | non-oncological | 1 728 893                                          |
| 52  | B.87.                  | Treatment of idiopathic pulmonary fibrosis                                                                                                                                                                               | non-oncological | 1 671 679                                          |
| 53  | B.84.                  | Lenalidomid for the treatment of patients with anemia depending on transformations in the course of myelodysplastic assemblies with low or indirect risk, risk associated with cytogenetic irregularity with 5q deletion | oncological     | 1 586 077                                          |
| 54  | B.69.                  | Treatment with paricalcitol of secondary hyperparathyroidism in haemodialysis patients                                                                                                                                   | non-oncological | 1 529 137                                          |
| 55  | B.76.                  | Treatment of tyrosinemia type 1 (ht-1)                                                                                                                                                                                   | non-oncological | 1 499 983                                          |
| 56  | B.78.                  | Treatment of primary immune deficiencies in adult patients with normal human immunoglobulin administered with human recombined hyaluronidase                                                                             | non-oncological | 1 389 103                                          |
| 57  | B.60.                  | Treatment of gaucher's disease type 1                                                                                                                                                                                    | non-oncological | 1 244 807                                          |
| 58  | B.42.                  | Treatment of dwarf children with turner syndrome (ts)                                                                                                                                                                    | non-oncological | 1 032 587                                          |
| 59  | B.20.                  | Treatment of dwarf children with severe primary igf-1 deficiency                                                                                                                                                         | non-oncological | 887 751                                            |
| 60  | B.27.                  | Treatment of chronic lung infections in beneficiaries with mucoviscidosis                                                                                                                                                | non-oncological | 832 382                                            |
| 61  | B.65.                  | Treatment of acute lymphoblastic leukemia                                                                                                                                                                                | oncological     | 826 749                                            |
| 62  | B.30.                  | Treatment of spasticity in cerebral palsy                                                                                                                                                                                | non-oncological | 810 558                                            |

| Lp. | Number of drug program | Name of drug program                                                                                                                              | Type            | Values of reimbursement realised by the NHF, [USD] |
|-----|------------------------|---------------------------------------------------------------------------------------------------------------------------------------------------|-----------------|----------------------------------------------------|
| 63  | B.37.                  | Treatment of anaemia in the course of chronic renal insufficiency                                                                                 | non-oncological | 778 431                                            |
| 64  | B.57.                  | Treatment of upper limb spasticity after stroke with botulinum toxin type a                                                                       | non-oncological | 762 256                                            |
| 65  | B.66.                  | Treatment with bexarotene of mycosis fungoides or sézary syndrome                                                                                 | oncological     | 736 061                                            |
| 66  | B.88.                  | Treatment of patients with advanced basocellular skin cancer wismodegib                                                                           | oncological     | 609 818                                            |
| 67  | B.85.                  | Treatment of patients with metastatic pancreatic adenocarcinoma                                                                                   | oncological     | 603 611                                            |
| 68  | B.18.                  | Treatment of premature sexual maturation in children                                                                                              | non-oncological | 478 466                                            |
| 69  | B.75.                  | Treatment of active granulomatosis with polyangiitis (gpa) or microscopic polyangiitis (mpa)                                                      | non-oncological | 475 941                                            |
| 70  | B.64.                  | Treatment with growth hormone of dwarf children born too small in relation to pregnancy length (sga or iugr)                                      | non-oncological | 409 770                                            |
| 71  | B.49.                  | Oral treatment of iron overload states in the body                                                                                                | non-oncological | 372 776                                            |
| 72  | B.52.                  | Treatment of squamous cell cancer of head and neck                                                                                                | oncological     | 364 229                                            |
| 73  | B.41.                  | Treatment of prader-willi syndrome                                                                                                                | non-oncological | 207 472                                            |
| 74  | B.43.                  | Treatment of viral hepatitis b in beneficiaries after transplantations or in beneficiaries with lymphomas, treated with rituximab                 | non-oncological | 186 964                                            |
| 75  | B.38.                  | Treatment of dwarf children with chronic kidney failure                                                                                           | non-oncological | 114 339                                            |
| 76  | B.83.                  | Treatment of lower limb spasticity after stroke with botulinum toxin type a                                                                       | non-oncological | 89 713                                             |
| 77  | B.82.                  | Treatment of certolizumab pegol patients with heavy, active form of axial spondyloartropathy (spa) without radiographic changes                   | non-oncological | 69 770                                             |
| 78  | B.21.                  | Treatment of severe familial hyperhomocysteinemia                                                                                                 | non-oncological | 63 785                                             |
| 79  | B.89.                  | Treatment with ewerolimus of patients with sclerosis tuberosa non-qualifying for operative treatments with <i>subependymal</i> giant cells (sega) | oncological     | 52 467                                             |
| 80  | B.61.                  | Treatment of nephropathic juvenile cystinosis                                                                                                     | non-oncological | 39 084                                             |
| 81  | B.86.                  | Treatment of congenitated auto-inflammatory assemblies                                                                                            | non-oncological | 36 356                                             |
| 82  | B.90.                  | Treatment of motor disorders in the course of advanced parkinson's disease                                                                        | non-oncological | 17 303                                             |

| Lp. | Number of drug program | Name of drug program                          | Type            | Values of reimbursement realised by the NHF, [USD] |
|-----|------------------------|-----------------------------------------------|-----------------|----------------------------------------------------|
| 83  | B.73.                  | Treatment of neurogenic detrusor overactivity | non-oncological | 13 543                                             |

Source: own elaboration, NHF data.

## REIMBURSEMENT BY DRUG PROGRAMME TYPE IN POLAND ESTIMATES TO 2018

Appendix. 4. Reimbursement by drug programme type in Poland estimates to 2018, [USD].

| Lp. | Number of drug program | Name of drug program                                                           | Type            | Values of reimbursement realised by the NHF, [USD] |
|-----|------------------------|--------------------------------------------------------------------------------|-----------------|----------------------------------------------------|
| 1   | B.9.                   | Treatment of breast cancer                                                     | oncological     | 120 564 937                                        |
| 2   | B.29.                  | Treatment of multiple sclerosis                                                | non-oncological | 74 570 625                                         |
| 3   | B.71.                  | Interferon-free treatment of chronic viral hepatitis C                         | non-oncological | 58 957 833                                         |
| 4   | B.4.                   | Treatment of advanced colorectal cancer                                        | oncological     | 46 374 846                                         |
| 5   | B.54.                  | treatment of refractory or relapsed multiple myeloma                           | oncological     | 43 222 355                                         |
| 6   | B.10.                  | Treatment of renal cell carcinoma                                              | oncological     | 38 155 171                                         |
| 7   | B.33.                  | Treatment of rheumatoid arthritis and aggressive juvenile idiopathic arthritis | non-oncological | 35 534 988                                         |
| 8   | B.59.                  | Treatment of skin or mucosal melanoma                                          | oncological     | 32 643 073                                         |
| 9   | B.14.                  | Treatment of chronic myeloid leukemia                                          | oncological     | 29 714 120                                         |
| 10  | B.31.                  | Treatment of pulmonary arterial hypertension (PAH)                             | non-oncological | 26 660 996                                         |
| 11  | B.56.                  | Treatment of castration-resistant prostate cancer                              | oncological     | 22 327 920                                         |
| 12  | B.3.                   | Treatment of gastrointestinal stromal tumours (GIST)                           | oncological     | 22 273 244                                         |

| Lp. | Number of drug program | Name of drug program                                                                                             | Type            | Values of reimbursement realised by the NHF, [USD] |
|-----|------------------------|------------------------------------------------------------------------------------------------------------------|-----------------|----------------------------------------------------|
| 13  | B.70.                  | Treatment of neovascular (exudative) form of age-related macular degeneration (AMD)                              | non-oncological | 21 045 965                                         |
| 14  | B.46.                  | Treatment of multiple sclerosis after first line treatment failure or rapidly evolving severe multiple sclerosis | non-oncological | 20 021 314                                         |
| 15  | B.36.                  | Treatment of beneficiaries with severe active ankylosing spondylitis with TNF alfa inhibitors                    | non-oncological | 19 835 842                                         |
| 16  | B.72.                  | Treatment of melanoma with combination therapy with dabrafenib and trametinib                                    | oncological     | 18 463 676                                         |
| 17  | B.6.                   | Treatment of non-small cell lung cancer                                                                          | oncological     | 17 049 924                                         |
| 18  | B.12.                  | Treatment of malignant lymphomas                                                                                 | oncological     | 15 579 222                                         |
| 19  | B.67.                  | Treatment with immunoglobulin transfusions in neurologic diseases                                                | non-oncological | 15 333 074                                         |
| 20  | B.23.                  | Treatment of Gaucher's disease                                                                                   | non-oncological | 14 673 701                                         |
| 21  | B.35.                  | Treatment of aggressive psoriatic arthritis                                                                      | non-oncological | 11 102 138                                         |
| 22  | B.68.                  | Treatment of pulmonary arterial hypertension with sildenafil, epoprostenol and macitentan (pah)                  | non-oncological | 10 909 480                                         |
| 23  | B.32.                  | Treatment of crohn's disease (cd)                                                                                | non-oncological | 9 712 364                                          |
| 24  | B.81.                  | Treatment of primary myelofibrosis and secondary myelofibrosis in the course of polycythemia and thrombocytosis  | oncological     | 9 323 293                                          |
| 25  | B.87.                  | Treatment of idiopathic pulmonary fibrosis                                                                       | non-oncological | 9 265 419                                          |
| 26  | B.15.                  | Haemorrhages prevention in children with haemophilia a and b                                                     | non-oncological | 8 739 265                                          |
| 27  | B.1.                   | Treatment of chronic viral hepatitis b                                                                           | non-oncological | 8 684 694                                          |
| 28  | B.48.                  | Treatment of skin melanoma                                                                                       | oncological     | 8 626 239                                          |
| 29  | B.22.                  | Treatment of pompe disease                                                                                       | non-oncological | 8 567 666                                          |
| 30  | B.77.                  | Treatment of resistant and relapse lymphomas cd30+                                                               | oncological     | 7 935 812                                          |
| 31  | B.80.                  | Maintenance therapy with olaparib of patients with relapsed platinum-sensitive advanced ovarian cancer,          | oncological     | 7 755 700                                          |

| Lp. | Number of drug program | Name of drug program                                                                                                                                                                                                    | Type            | Values of reimbursement realised by the NHF, [USD] |
|-----|------------------------|-------------------------------------------------------------------------------------------------------------------------------------------------------------------------------------------------------------------------|-----------------|----------------------------------------------------|
|     |                        | fallopian tube cancer or primary peritoneal cancer                                                                                                                                                                      |                 |                                                    |
| 32  | B.50.                  | Treatment of patients with advanced ovarian cancer                                                                                                                                                                      | oncological     | 7 391 638                                          |
| 33  | B.40.                  | Prevention of respiratory syncytial virus infections                                                                                                                                                                    | non-oncological | 7 306 999                                          |
| 34  | B.44.                  | Treatment of severe ige-dependent allergic asthma with omalizumab                                                                                                                                                       | non-oncological | 6 977 968                                          |
| 35  | B.19.                  | Treatment of dwarf children with somatotropin pituitary insufficiency                                                                                                                                                   | non-oncological | 6 869 004                                          |
| 36  | B.25.                  | Treatment of mucopolisacharosis type ii (hunter syndrome)                                                                                                                                                               | non-oncological | 6 678 216                                          |
| 37  | B.47.                  | Treatment of aggressive psoriatic arthritis                                                                                                                                                                             | non-oncological | 6 112 470                                          |
| 38  | B.62.                  | Treatment of primary immunodeficiency in adults                                                                                                                                                                         | non-oncological | 5 549 987                                          |
| 39  | B.79.                  | Treatment of chronic lymphocytic leukemia with obinutuzumab                                                                                                                                                             | oncological     | 5 514 203                                          |
| 40  | B.74.                  | Treatment of chronic thromboembolic pulmonary hypertension (cteph)                                                                                                                                                      | non-oncological | 4 589 063                                          |
| 41  | B.84.                  | Lenalidomid for the treatment of patients with anemia depending on transformations in the course of mylodysplastic assemblies with low or indirect risk, risk associated with cytogenetic irregularity with 5q deletion | oncological     | 3 914 369                                          |
| 42  | B.92.                  | Ibrutinib in the treatment of patients with chronic lymphocytic leukemia                                                                                                                                                | oncological     | 3 768 442                                          |
| 43  | B.8.                   | Treatment of soft tissue sarcomas                                                                                                                                                                                       | oncological     | 3 478 333                                          |
| 44  | B.88.                  | Treatment of patients with advanced basocellular skin cancer wismodegib                                                                                                                                                 | oncological     | 3 438 567                                          |
| 45  | B.39.                  | Treatment of secondary hyperparathyroidism in haemodialysis patients                                                                                                                                                    | non-oncological | 3 218 567                                          |
| 46  | B.63.                  | Treatment of non-small cell lung cancer with afatinib and nintedanib                                                                                                                                                    | oncological     | 3 076 843                                          |
| 47  | B.95.                  | Treatment of atypical hemolytic-uremic syndrome ( <i>ahus</i> )                                                                                                                                                         | non-oncological | 3 048 972                                          |
| 48  | B.96.                  | Treatment of paroxysmal nocturnal hemoglobinuria                                                                                                                                                                        | non-oncological | 3 022 699                                          |
| 49  | B.5.                   | Treatment of hepatocellular carcinoma                                                                                                                                                                                   | oncological     | 2 855 103                                          |

| Lp. | Number of drug program | Name of drug program                                                                                                                          | Type            | Values of reimbursement realised by the NHF, [USD] |
|-----|------------------------|-----------------------------------------------------------------------------------------------------------------------------------------------|-----------------|----------------------------------------------------|
| 50  | B.78.                  | Treatment of primary immune deficiencies in adult patients with normal human immunoglobulin administered with human recombinant hyaluronidase | non-oncological | 2 852 819                                          |
| 51  | B.24.                  | Treatment of Hurler disease                                                                                                                   | non-oncological | 2 836 066                                          |
| 52  | B.17.                  | Treatment of primary immunodeficiency in children                                                                                             | non-oncological | 2 832 343                                          |
| 53  | B.55.                  | Treatment of patients with ulcerative colitis                                                                                                 | non-oncological | 2 781 703                                          |
| 54  | B.28.                  | Treatment of focal dystonia and hemifacial spasm                                                                                              | non-oncological | 2 578 618                                          |
| 55  | B.85.                  | Treatment of patients with metastatic pancreatic adenocarcinoma                                                                               | oncological     | 2 329 798                                          |
| 56  | B.58.                  | Treatment of advanced gastric cancer                                                                                                          | oncological     | 2 262 861                                          |
| 57  | B.53.                  | Treatment of well-differentiated neuroendocrine pancreatic carcinoma                                                                          | oncological     | 1 731 430                                          |
| 58  | B.69.                  | Treatment of secondary hyperparathyroidism in haemodialysis patients                                                                          | non-oncological | 1 513 055                                          |
| 59  | B.60.                  | Treatment of gaucher's disease type i                                                                                                         | non-oncological | 1 422 153                                          |
| 60  | B.26.                  | Treatment of mucopolysaccharidosis type IV (Maroteaux-Lamy syndrome)                                                                          | non-oncological | 1 334 243                                          |
| 61  | B.76.                  | Treatment of tyrosinemia type 1 (ht-1)                                                                                                        | non-oncological | 1 271 372                                          |
| 62  | B.20.                  | Treatment of dwarf children with severe primary igf-1 deficiency                                                                              | non-oncological | 1 135 330                                          |
| 63  | B.42.                  | Treatment of dwarf children with Turner syndrome (TS)                                                                                         | non-oncological | 1 059 483                                          |
| 64  | B.2.                   | Treatment of chronic viral hepatitis C                                                                                                        | non-oncological | 1 057 169                                          |
| 65  | B.27.                  | Treatment of chronic lung infections in beneficiaries with mucoviscidosis                                                                     | non-oncological | 885 183                                            |
| 66  | B.57.                  | Treatment of upper limb spasticity after stroke with botulinum toxin type a                                                                   | non-oncological | 867 516                                            |
| 67  | B.65.                  | Treatment of acute lymphoblastic leukemia                                                                                                     | oncological     | 849 380                                            |
| 68  | B.30.                  | Treatment of spasticity in cerebral palsy                                                                                                     | non-oncological | 786 463                                            |

| Lp. | Number of drug program | Name of drug program                                                                                                                              | Type            | Values of reimbursement realised by the NHF, [USD] |
|-----|------------------------|---------------------------------------------------------------------------------------------------------------------------------------------------|-----------------|----------------------------------------------------|
| 69  | B.89.                  | Treatment with ewerolimus of patients with sclerosis tuberosa non-qualifying for operative treatments with <i>subependymal</i> giant cells (sega) | oncological     | 772 851                                            |
| 70  | B.64.                  | Treatment with growth hormone of dwarf children born too small in relation to pregnancy length (sga or iugr)                                      | non-oncological | 749 597                                            |
| 71  | B.37.                  | Treatment of anaemia in the course of chronic renal insufficiency                                                                                 | non-oncological | 731 097                                            |
| 72  | B.66.                  | Treatment with beksarotene of mycosis fungoides or sézary syndrome                                                                                | oncological     | 718 945                                            |
| 73  | B.90.                  | Treatment of motor disorders in the course of advanced parkinson's disease                                                                        | non-oncological | 611 303                                            |
| 74  | B.75.                  | Treatment of active granulomatosis with polyangiitis (gpa) or microscopic polyangiitis (mpa)                                                      | non-oncological | 523 936                                            |
| 75  | B.82.                  | Treatment of certolizumab pegol patients with heavy, active form of axial spondyloarthritis without radiographic changes                          | non-oncological | 509 266                                            |
| 76  | B.18.                  | Treatment of premature sexual maturation in children                                                                                              | non-oncological | 507 553                                            |
| 77  | B.83.                  | Treatment of lower limb spasticity after stroke with botulinum toxin type a                                                                       | non-oncological | 450 700                                            |
| 78  | B.93.                  | Pixsantron for the treatment of malignant lymphoma                                                                                                | oncological     | 427 712                                            |
| 79  | B.97.                  | Treatment of adults with idiopathic thrombocytopenic purpura                                                                                      | non-oncological | 352 674                                            |
| 80  | B.100.                 | Treatment of resistant and recurrent form of hodgkin's classic lymphoma using niwolumab                                                           | oncological     | 259 071                                            |
| 81  | B.86.                  | Treatment of congenitally auto-inflammatory disorders                                                                                             | non-oncological | 243 684                                            |
| 82  | B.52.                  | Treatment of squamous cell cancer of head and neck                                                                                                | oncological     | 224 321                                            |
| 83  | B.41.                  | Treatment of prader - willi syndrome                                                                                                              | non-oncological | 220 229                                            |
| 84  | B.49.                  | Oral treatment of iron overload states in the body                                                                                                | non-oncological | 219 311                                            |
| 85  | B.98.                  | Treatment of pediatric patients with chronic primary immunothrombocytopenia                                                                       | non-oncological | 215 894                                            |
| 86  | B.43.                  | Treatment of viral hepatitis B in beneficiaries after transplantations or in beneficiaries with lymphomas, treated with rituximab                 | non-oncological | 170 902                                            |
| 87  | B.91.                  | Treatment of severe immunoresistant pemphigus with rituximab                                                                                      | non-oncological | 144 466                                            |
| 88  | B.99.                  | Treatment of acromegaly with pasipathide                                                                                                          | non-oncological | 103 823                                            |
| 89  | B.38.                  | Treatment of dwarf children with chronic kidney failure                                                                                           | non-oncological | 102 225                                            |



| <b>Lp.</b> | <b>Number of drug program</b> | <b>Name of drug program</b>                       | <b>Type</b>     | <b>Values of reimbursement realised by the NHF, [USD]</b> |
|------------|-------------------------------|---------------------------------------------------|-----------------|-----------------------------------------------------------|
| <b>90</b>  | B.21.                         | Treatment of severe familial hyperhomocysteinemia | non-oncological | 54 227                                                    |
| <b>91</b>  | B.61.                         | Treatment of nephropathic juvenile cystinosis     | non-oncological | 18 842                                                    |
| <b>92</b>  | B.73.                         | Treatment of neurogenic detrusor overactivity     | non-oncological | 9 815                                                     |

*Source: own elaboration, NHF data.*
